# Supplementary material for: Reaction of silylene with sulfur dioxide: some gas-phase kinetic and theoretical studies
Source: Royal Society of Chemistry journal article supplement (doi:10.1039/c3cp52189c), 2013-01-01
Supplement: c3cp52189c.pdf [file c3cp52189c.pdf]

## Supplementary Information

### Reaction of Silylene with Sulfur Dioxide: Some Gas-Phase Kinetic and Theoretical Studies

Rosa Becerra, J. Pat Cannady, Nicola Goldberg and Robin Walsh

#### Microscopic reversibility (conversion of units and standard states)

This equation links kinetic and thermodynamic quantities for reversible reactions. It is often written:  $\ln(A_1/A_{-1}) = \Delta S_{1,-1}^\circ/R$ . This hides the complexity that, whereas  $\Delta S_{1,-1}^\circ$  is referenced to the pressure standard state of 1 bar, rate constants such as  $A_1$  are measured in concentration units, viz.  $\text{cm}^3 \text{ molecule}^{-1} \text{ s}^{-1}$  in this case.

The easiest way to deal with this problem is to correct  $\Delta S_{1,-1}^\circ$  from 1 bar (called  $\Delta S_p^\circ$  below) to  $1 \text{ mol dm}^{-3}$  (called  $\Delta S_c^\circ$  below), via the equation<sup>1s</sup>:

$$\Delta S_p^\circ = \Delta S_c^\circ + (\Delta n)R \times \ln R'T$$

where  $R = 8.3145 \text{ J K}^{-1} \text{ mol}^{-1}$  and  $R' = 0.08206 \text{ bar dm}^3 \text{ mol}^{-1} \text{ K}^{-1}$ .

Note that the value of  $A_1$  has to be converted from  $\text{dm}^3 \text{ mol}^{-1} \text{ s}^{-1}$  to  $\text{cm}^3 \text{ molecule}^{-1} \text{ s}^{-1}$ .

#### Further Quantum Chemical calculations for $\text{SiH}_2 + \text{CO}_2$

Both G3 and G2 calculations were carried out on this system: G3 for comparison with those for  $\text{SiH}_2 + \text{SO}_2$  system (main paper) and G2 for consistency with earlier calculations<sup>2s</sup> on the  $\text{SiH}_2 + \text{CO}_2$  reaction. The results are shown in Table S1 (below). It can be seen that the  $\Delta H_{\text{rel}}$  values differ by no more than  $6 \text{ kJ mol}^{-1}$ , indicating reasonable agreement between the two levels of calculation. The new structures, ie of species not found earlier, are shown in Fig. S1.

*cont. over page*

**Table S1**  $G3^a$  and  $G2^b$  calculated total enthalpies,  $H$ /hartree, and relative enthalpies,  $\Delta H_{\text{rel}}/\text{kJ mol}^{-1}$ , for stationary points of interest on the  $\text{H}_2\text{SiCO}_2$  energy surface

| Species                                                                                       | $G3^c$                      |                                            | $G2$                        |                                            |
|-----------------------------------------------------------------------------------------------|-----------------------------|--------------------------------------------|-----------------------------|--------------------------------------------|
|                                                                                               | $H(298\text{ K})/\text{ha}$ | $\Delta H_{\text{rel}}/\text{kJ mol}^{-1}$ | $H(298\text{ K})/\text{ha}$ | $\Delta H_{\text{rel}}/\text{kJ mol}^{-1}$ |
| $\text{SiH}_2 + \text{CO}_2$                                                                  | -478.950438                 | 0                                          | -478.521649 <sup>d</sup>    | 0                                          |
| $\text{SiH}_2 \cdots \text{CO}_2$ (complex)                                                   | -478.955484                 | -13                                        | -478.527461 <sup>d</sup>    | -15                                        |
| 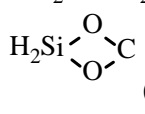<br>(4-ring) | -478.976467                 | -68                                        | -478.545523 <sup>c</sup>    | -63                                        |
| Siloxiranone (3-ring)                                                                         | -478.980103                 | -78                                        | -478.549586 <sup>d</sup>    | -73                                        |
| $\text{H}_2\text{SiO} \cdots \text{CO}$ (complex)                                             | -478.985194                 | -91                                        | -478.554958 <sup>d</sup>    | -97                                        |
| $\text{H}_2\text{SiO} + \text{CO}$                                                            | -478.979532                 | -76                                        | -478.549824 <sup>d</sup>    | -74                                        |
| TS: $\text{SiH}_2 \cdots \text{CO}_2$ to 4-ring                                               | -478.916769                 | +88                                        | -478.487316 <sup>c</sup>    | +90                                        |
| TS: $\text{SiH}_2 \cdots \text{CO}_2$ to 3-ring                                               | -478.946281                 | +11                                        | -478.517211 <sup>d</sup>    | +12                                        |
| TS: 3-ring to $\text{H}_2\text{SiO} \cdots \text{CO}$                                         | -478.974552                 | -63                                        | -478.543277 <sup>d</sup>    | -57                                        |

<sup>a</sup> Full expression:  $G3//\text{MP2}=\text{Full}/6-31\text{G}(\text{d})$     <sup>b</sup> Full expression:  $G2//\text{MP2}=\text{Full}/6-31\text{G}(\text{d})$

<sup>c</sup> This work    <sup>d</sup> ref. 2s

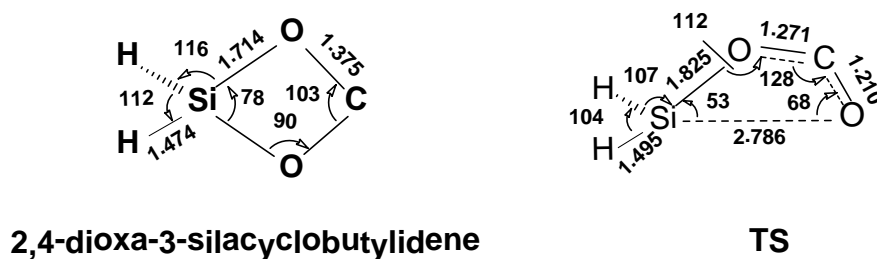

**Fig. S1** Quantum Chemical  $\text{MP2}=\text{Full}/6-31\text{G}(\text{d})$  calculated geometries of the cyclic four-membered ring product of reaction of  $\text{SiH}_2 + \text{CO}_2$  and its transition state for formation. Selected distances are given in Å and angles in degrees.

Note: fuller details of previous calculations on the  $\text{SiH}_2 + \text{CO}_2$  are given in reference 2s.

## References

- (1s) S. W. Benson, *Thermochemical Kinetics*, 2<sup>nd</sup> ed.; Wiley: New York, 1976, pp 8, 9.
- (2s) R. Becerra, J. P. Cannady and R. Walsh, *J. Phys. Chem. A*, 2002, **106**, 4922.
